1 Exploring patient-, provider-, and health facility-level determinants of blood pressure among  
2 patients with hypertension: A multicenter study in Ghana

3  
4  
5 Samuel Byiringiro<sup>1\*</sup>, Thomas Hinneh<sup>1</sup>, Yvonne Commodore-Mensah<sup>1,2</sup>, Jill Masteller<sup>2</sup>, Fred  
6 Stephen Sarfo<sup>3,4</sup>, Nancy Perrin,<sup>1</sup> Shadrack Assibey<sup>4</sup>, Cheryl R. Himmelfarb<sup>1,2,5</sup>

7  
8 <sup>1</sup>Johns Hopkins University School of Nursing, Baltimore, Maryland, United States

9 <sup>2</sup>Johns Hopkins University, Bloomberg School of Public Health, Baltimore, Maryland,  
10 United States

11 <sup>3</sup>Kwame Nkrumah University of Science & Technology, Department of Medicine, Kumasi,  
12 Ashanti Region, Ghana

13 <sup>4</sup>Komfo Anokye Teaching Hospital, Kumasi, Ashanti Region, Ghana

14 <sup>5</sup>Johns Hopkins University, School of Medicine, Baltimore, Maryland, United States

15

16

17 **\*Corresponding Author:**

18 **Email:** [sbyirin1@jhu.edu](mailto:sbyirin1@jhu.edu) (SB)

19

## 20 Abstract

21 Optimal blood pressure (BP) control is essential in averting cardiovascular disease and  
22 associated complications. Multi-level factors influence the achievement of BP targets in  
23 hypertension management. We explored patient-, provider-, and health facility-level factors of  
24 systolic and diastolic BP and controlled BP status among patients with hypertension in Ghana,  
25 where the burden of hypertension and cardiovascular disease is rising. Using a cross-sectional  
26 design, we recruited 15 health facilities, and from each facility, four healthcare professionals  
27 who managed patients with hypertension and 15 patients diagnosed with hypertension. The  
28 primary outcome of interest was systolic and diastolic BP; the secondary outcome was BP  
29 control (<140/90 mmHg) in compliance with Ghana's national standard treatment guidelines. We  
30 used mixed-effects regression models to explore the patient- and facility-level predictors of the  
31 outcomes. From the 15 health facilities, we recruited 67 healthcare providers with a mean (SD)  
32 age of 32 (7) and 224 patients with a mean (SD) age of 60.5 (12.7). Most (182 [81%]) of the  
33 patient participants were female, and almost half (109 [49%]) had controlled BP. At the patient  
34 level, secondary school education (Coeff.: -7.69, 95% CI: -15.13, -0.26) was associated with  
35 lower systolic BP than a lower level of education; and traveling for 30 minutes to 1 hour to the  
36 health facility was associated with higher diastolic BP (Coeff.: 3.75, 95% CI: 0.12, 7.38) and  
37 lower odds of BP control (OR: 0.51, 95% CI: 0.28, 0.92) than traveling less than 30 minutes.  
38 Receiving care at government health facilities was associated with less systolic BP (Coeff.: -  
39 19.4; 95% CI: -33.58, -5.22) than private health facilities. A higher patient-to-physician or  
40 physician assistant ratio was associated with more elevated systolic BP (Coeff.: 23.06, 95% CI:  
41 10.06, 36.05) and lower odds of controlled BP (OR: 0.18, 95% CI: 0.05, 0.74). Further research

42 is warranted to identify effective strategies to address the multi-level factors influencing  
43 hypertension control and to mitigate the rising burden of hypertension in Ghana.

44 **Keywords:** High blood pressure, hypertension, Sub-Saharan Africa, Health systems

45

## 46 Background

47 A quarter of the adult population in Sub-Saharan Africa (SSA) is estimated to be living with  
48 chronic hypertension, a major risk factor for leading causes of death, cardiovascular disease, and  
49 stroke [1,2]. In Ghana, approximately 27% of the adult population has hypertension, yet 65% of  
50 the patients are unaware of their hypertension status [3]. Twenty-one percent of patients are on  
51 treatment, and only 27% of patients on treatment achieve controlled Blood Pressure (BP) (6% of  
52 all hypertensive patients)— which highlights the dire need for improving the quality of  
53 hypertension care services [3]. Countries in SSA are predominantly classified by the World Bank  
54 as low-income and are ill-equipped with frail health systems that are not prepared to respond to  
55 the projected further rise in hypertension and other non-communicable diseases (NCDs) [4].  
56 Inadequate health systems financing contributes to the shortcomings across key health system  
57 components including the lack of essential equipment, proper training of staff, and the  
58 continuous stocking of health facility pharmacies with necessary consumables [5,6]. These  
59 shortcomings further limit the public health systems' initiatives to raise the population's  
60 awareness of the dangers of major NCDs such as hypertension, hence leaving most patients  
61 undiagnosed and therefore without access to treatment. Effective strategies are needed to respond  
62 to the rising burden of hypertension.

63 While hypertension is a chronic condition with life-threatening complications, these can be  
64 averted by controlling BP using lifestyle modifications, antihypertensive therapy, or both [7].  
65 Multiple guidelines with different thresholds for defining hypertension and initiating patients on  
66 treatment exist [7–10]. The 2017 American Heart Association/American College of Cardiology  
67 guidelines recommend a treatment target of  $\leq 130/80$  mmHg [7] while the World Heart  
68 Federation in its 2021 roadmap for hypertension management as well as many countries in SSA

69 recommend a treatment to target of  $\leq 140/90$  mmHg [10]. Despite variabilities in BP treatment  
70 targets, evidence shows that even among patients with uncontrolled hypertension, a 5-mmHg  
71 reduction in systolic or diastolic BP is associated with better health outcomes through the  
72 reduction of composite cardiovascular event risk [11,12]. It would hence be beneficial to explore  
73 factors not only of hypertension control, but also for systolic and diastolic BP reduction.

74 The factors that influence hypertension care and outcomes are multifaceted and exist at the  
75 individual, community, and health system levels. The individual-level factors that have shown an  
76 association with hypertension include age, sex, socioeconomic status, education, employment,  
77 family history of hypertension, and lifestyles such as smoking, high salt consumption,  
78 alcoholism, and the lack of physical exercise [13]. At the community level, the lack of resources  
79 (or policy to ensure the availability of the resources) such as patient peer support groups, non-  
80 access to the facilities for physical exercises, and affordable foods for healthy diets contribute to  
81 the worsening status of hypertensive patients [14,15]. There are very interlinked influences  
82 among the various risk levels of acquiring or having a worsened state of hypertension. Without  
83 strong health facilities and systems, the population sensitization and screening for elevated BP  
84 are very weak. At the health facilities, provider factors such as inadequate training and shortages  
85 of healthcare providers could contribute to poor BP outcomes among patients already on  
86 hypertension treatment. These factors make the exploration of multi-level factors of hypertension  
87 care and outcomes very important.

88 Health facilities play a critical role in coordinating screening for raised BP and ensuring that  
89 identified patients achieve desired BP targets. The World Health Organization (WHO)'s health  
90 systems framework highlights six key factors of health systems strengthening to look out for  
91 including: service delivery, health workforce, medications, diagnostics, equipment, and

92 technology, health information systems, financing, and leadership and governance [16]. In the  
93 context of hypertension care, health facilities require a sufficient number of well-trained  
94 healthcare providers, validated and regularly inspected BP devices, and other essential tools for  
95 taking physical measurements, sufficient stock of evidence-based anti-hypertensive medications,  
96 and all the systems for ensuring that diagnosed patients are initiated and maintained on  
97 treatment. The aim of this study was to explore the health facility readiness for hypertension  
98 management and assess the patient-, provider- and health facility-level factors of systolic and  
99 diastolic BP and BP control among patients receiving hypertension care at 15 health facilities in  
100 Kumasi, Ghana.

## 101 **Methods**

### 102 **Setting**

103 We conducted this study in the Kumasi Metropolitan District, the capital city of the Ashanti  
104 region in Ghana [17]. According to the 2010 population and housing census in Ghana, the  
105 Kumasi Metropolitan District had a population of 1,730,249 (36% of the Ashanti region's  
106 population) but grew up to approximately 2,096,053 people by 2019 [18,19]. The Kumasi  
107 Metropolitan District is served by 263 health facilities, 145 of which are clinics, three health  
108 centers, 53 hospitals, six training institutions, 55 maternity homes, and one regional hospital. Of  
109 all the health facilities, 224 are privately owned, 18 are quasi- governmental, 16 are government  
110 owned, and five are owned by the Christian Health Association of Ghana (CHAG) [20].

### 111 **Design**

112 We used a cross-sectional study design to explore the patient-, provider-, and health facility-level  
113 determinants of systolic and diastolic BP and the overall BP control. We followed the

114 Strengthening the Reporting of Observational Studies in Epidemiology (STROBE) checklist [21]  
115 to ensure an elaborate and unbiased reporting and discussion of the findings (S1 Table).

## 116 **Participants**

117 We used a convenience sample of 15 health facilities at different levels of the health system and  
118 ownership. Eligible health facilities were as follows: (a) located in Kumasi Metropolitan District;  
119 (b) provided hypertension service per the ministry of health structure; (c) qualified as  
120 government, quasi-governmental, private or Christian Health Association of Ghana hospital,  
121 regional or tertiary hospitals, Clinics, or community health centers; and (d) had leadership  
122 willing to be part of the study. From each participating health facility, we recruited four  
123 healthcare providers involved in managing patients with hypertension. All clinical care  
124 providers—including nurses, physicians, physician assistants, and dietitians working in  
125 hypertension care clinics or outpatient departments (OPD)—were eligible to participate in the  
126 study.

127 Additionally, from each health facility, we recruited 15 patients diagnosed with hypertension and  
128 prescribed antihypertensive therapy. We included patients 18 years of age and older.

129 We conducted the recruitment and data collection between April 15<sup>th</sup> and June 1<sup>st</sup>, 2022.

## 130 **Recruitment and data collection process**

131 We traveled to the health facilities for data collection after receiving the signed memorandum of  
132 understanding from the health facilities. We dedicated a minimum of two days per health facility  
133 for data collection. After arriving at the health facility, a pair of trained enumerators, led by the  
134 ranking health facility leader, visited the different health facility units to collect facility-level  
135 data about hypertension. Another enumerator recruited potential participants among healthcare

136 providers to complete the self-administered survey at that time or take the link and complete the  
137 survey later. On the second day, the team recruited patients coming for their usual hypertension  
138 care appointments. Before data collection, both the providers and patients signed the consent  
139 form, electronically for healthcare providers and on paper for patients,. We compensated patients  
140 and providers with 10 USD and 25 USD, respectively, for their time.

#### 141 Outcome of interest

142 The primary outcome was the patients' systolic and diastolic BP. We treated the systolic and  
143 diastolic BP as continuous variables. To measure patients' BP, we used Omron 7 Series Upper  
144 Arm BP Monitor following the American Heart Association's guideline for BP measurement  
145 [22]. After 3 minutes of patient rest, we took three consecutive measures of BP with 1 minute  
146 between each measurement and used the average of the last two for BP measurement  
147 ascertainment.

#### 148 Secondary outcomes

149 The secondary outcome was BP control. We adopted the treatment goal stated by the Ghana  
150 hypertension treatment guidelines to define BP control (<140/90 mmHg) [23]. We hence treated  
151 the BP control as a binary variable.

#### 152 Exposures of interest

153 The exposures of interest were at the health facility and patient level.

#### 154 *Patient level exposures*

155 We measured the patient behaviors regarding adherence to high BP treatment using the Hill-  
156 Bone Compliance to High Blood Pressure Therapy Scale (HB-HBP), a 14-item scale with an  
157 internal consistency reliability of 0.85 [24]. HB-HBP has 4 choice options on the Likert scale



158 ranging from “All of the Time” to “None of the Time” valid for 1 to 4 points respectively in that  
159 order except for item 6 “How often do you make the next appointment before you leave the  
160 doctor’s office?” which requires reverse coding. HB-HBP scores ranged from 14 to 56, with  
161 higher scores indicating behaviors of higher adherence to high BP therapy. HB-HBP consists of  
162 three sub-scales: (1) dietary sodium intake, three items with score ranging from 3 to 12; (2)  
163 medication adherence, nine items with score ranging from 9 to 36; and (3) appointment keeping,  
164 two items with score ranging from 2 to 8. We treated the HB-HBP overall and subscale scores as  
165 continuous variables.

166 The other self-reported exposure variables that we measured at the patient level were the length  
167 of time with hypertension diagnosis, which we treated as a binary variable (<five years, ≥five  
168 years) and travel duration to the health facility where they received hypertension care services as  
169 a categorical variable (< 30 minutes, 30 minutes to < one hour, and ≥ one hour).

#### 170 *Healthcare provider level exposures*

171 The provider-level predictors were the provider knowledge of and attitude towards hypertension  
172 treatment guidelines. In Ghana, patients are not assigned a primary care provider who would  
173 ideally follow them up over time. They rather usually meet the healthcare provider who is in the  
174 consulting office on the day of their appointment. For this reason, we could not link specific  
175 provider responses with a given patients’ BP outcomes. We hence could not ascertain the  
176 association between patient BP and the provider knowledge score or attitudes towards  
177 hypertension guidelines.

178 We measured provider knowledge of hypertension treatment guidelines using a 23-item  
179 questionnaire developed by the investigation team. Five items were multiple choice questions

180 with four response options, six were multiple choice questions with three response options plus  
181 “I don’t know”, and 14 items were true and false questions with “I don’t know” as added  
182 response option. Each of the 23 items was scored at one point, and assigned if the provider made  
183 the correct selection. We reported the total scores out of 23, with higher scores indicating higher  
184 knowledge of hypertension guidelines.

185 To measure the provider attitude towards hypertension guidelines, we assessed their self-reported  
186 confidence in adhering to hypertension treatment guidelines. To measure self-reported  
187 confidence, we asked them to rate on a scale of “Very confident” to “Not at all confident” their  
188 adherence to guidelines while (1) measuring BP, (2) assigning hypertension diagnosis, (3)  
189 educating patients with hypertension on healthy lifestyles, (4) prescribing antihypertensive  
190 medications, and (5) their overall management of patients with hypertension. In addition to this  
191 5-point Likert scale, we had a “not applicable” option for the tasks that were outside the  
192 provider’s scope of practice.

### 193 *Health facility level exposures*

194 We used the WHO Service Availability and Readiness Assessment Tool to collect health  
195 facility-level measurements of hypertension service readiness [25]. Health facility characteristics  
196 included bed capacity as a categorical variable (<50, 50 to <100 beds, and  $\geq$ 100 beds), facility  
197 ownership as a categorical variable (government, private or Christian Health Association of  
198 Ghana (CHAG) health facilities), and possession of a hypertension clinic (versus managing  
199 patients in the general OPD) as a binary variable.

200 The indicators related to health workforce that we measured were the nurse-to-patient ratio and  
201 physician and physician assistant-to-patient ratio. To calculate the clinician-to-patient ratio, we

202 divided the number of patients received in the OPD in one recent month with the number of  
203 registered and enrolled nurses or the number of physicians (generalist and specialists) and  
204 physician assistants. We combined the physician and physician assistants because they were  
205 licensed to diagnose and prescribe anti-hypertensive medications in their scope of practice in  
206 Ghana. We categorized the patient-to-nurse ratio as  $< 20$ ,  $20$  to  $< 40$ , and  $\geq 40$  patients per nurse  
207 per month and the patient-to-physician or physician assistant ratio  $<140$ ,  $140$  to  $< 280$ , and  $\geq 280$   
208 patients per physician (or assistant) per month. We additionally asked if at least one healthcare  
209 provider had received training on hypertension treatment guidelines over the previous two years  
210 and treated this indicator as a binary variable.

211 The hypertension service readiness indicators we assessed were the availability of the 2017  
212 Ghana Standard treatment guidelines [26] or the 2019 National Guidelines for the Management of  
213 Cardiovascular Diseases (first edition) [23]; patient education materials consisting of brochures  
214 and risk charts; BP measurement apparatus (functional automated BP device or a  
215 sphygmomanometer with a stethoscope); the basic laboratory exams essential for patients with  
216 hypertension, and all first line antihypertensive medications according to Ghana protocol [27].  
217 The basic laboratory exams included were as follows: (1) valid dipstick for urine protein, (2)  
218 urine glucose, and (3) urine ketones, (4) glucometer for blood glucose and valid test strips, and  
219 (5) hemoglobinometer or analyzer for hemoglobin testing. The Ghana the Standard Treatment  
220 Guidelines 7<sup>th</sup> Edition [26] and the Essential Medicines List 7<sup>th</sup> Edition [27] require each health  
221 facility that treats hypertension to possess all the first line antihypertension medications:  
222 Angiotensin Converting Enzyme Inhibitors, Angiotensin Receptor Blocker, Calcium Channel  
223 Blocker, Thiazide, and Beta Blocker.

## 224 *Covariates*

225 The patient-level covariates we explored included patient age, educational level, employment  
226 status, and marital status. We treated patient age as a continuous variable; biological sex as a  
227 binary variable (male, female); education as a categorical variable (primary education or less,  
228 secondary education, and tertiary education or higher); employment status as a categorical  
229 variable (unemployed, employed, and retired); and marital status as a binary variable (married or  
230 cohabiting and single, separated or widowed).

231 The provider-level covariates we evaluated were age, sex, educational level, profession, and  
232 experience. We treated provider age as a continuous variable and sex as a binary variable (male,  
233 female), education as a categorical variable (associate degree or less, bachelor's degree, and  
234 post-graduate degree), and profession as a categorical variable (physicians (generalist, specialist,  
235 physician assistant), and nurses (enrolled and registered), and other clinical staff). We treated  
236 experience as a categorical variable (<two years, two to <four years,  $\geq$ four years).

237 We additionally asked providers whether they had received hypertension management training  
238 over the previous two years (yes or no) and the type of training they had received.

## 239 **Analysis**

240 We explored patients' characteristics by BP control status. We used means ( $\pm$ SD) to report  
241 continuous variables and proportions and percentages for categorical variables. We used two  
242 sample *t*-tests to compare means of the continuous variables and chi-square tests to compare the  
243 proportions of the categorical variables by the BP control status.

244 We used percentages to summarize provider characteristics and means to summarize provider  
245 scores of hypertension guidelines knowledge. To compare scores of hypertension guidelines

246 knowledge across the different categorical variables of provider characteristics, we used one-way  
247 analysis of variance. For the provider attitude towards hypertension guidelines, we reported  
248 percentages of providers in each level of self-reported confidence in adherence to the guidelines.  
249 We used a stacked graph to report the provider's levels of self confidence in adhering to  
250 hypertension treatment guidelines. Since the health facility-level data were limited in the number  
251 of observations, we reported proportions (proportion of health facilities which met a certain  
252 standard of hypertension care) and percentages for categorical variables, and the median and  
253 interquartile ranges (IQR) for continuous variables.

254 We used mixed-effects linear regression models to explore the patient- and health facility-level  
255 factors of systolic and diastolic BP, and used mixed-effects logistic regression models to explore  
256 the patient- and health facility-level factors of BP control. We chose this model to account for  
257 possible intra-cluster correlation in BP outcomes across the different health facilities. We  
258 initially estimated the bivariate models of each patient and facility level predictor then fitted fully  
259 adjusted models separately for patient- and facility-level predictors. At the patient-level, the fully  
260 adjusted models included the hypertension adherence variables, travel distance to the health  
261 facility, duration with hypertension diagnosis, and all sociodemographic characteristics listed  
262 under covariates. At the facility level, the fully adjusted model included the health facility  
263 characteristics (ownership, availability of hypertension clinic, bed capacity); health workforce  
264 indicators (patient-to-clinician ratio and provider training); and hypertension service availability  
265 indicators (availability of all first line antihypertensive medications). The distribution of data for  
266 these health facility level variables—basic laboratory exams, BP devices, and hypertension  
267 guidelines; and patient educational materials—rendered the fully adjusted model unstable and

268 were excluded. We reported the coefficients or odds ratio with the associated 95% confidence  
269 intervals. We considered associations with 0.05 or smaller  $p$ -values to be statistically significant.  
270 The power analysis assumed an Intra-Cluster Correlation (ICC) of 0.1 based on the systolic BP  
271 ICC reported by the Phone-based Intervention under Nurse Guidance after Stroke (PINGS) study  
272 interim results [28] and a BP control rate of 27% among hypertensive patients on treatment [3].  
273 With these assumptions, our mixed-effects logistic regression had 80% power to predict odds  
274 ratios of BP control of 1.92 or greater with continuous predictor variables with alpha of 0.05. For  
275 dichotomous predictor variables, odds ratios of 3.31, 3.37, and 4.28 were to be detectable if the  
276 predictor variable has a 50/50, 40/60, and 20/80 split, respectively.

## 277 Results

### 278 Patient Characteristics

279 This study included 224 patients with a mean (SD) age of 60.5 (12.7). Most participants, 182  
280 (81%) were female. The mean (SD) systolic BP was 139 (20) mmHg and diastolic BP was 85  
281 (13) mmHg (Table 1). Almost half of the participants, 109 (49%) participants had controlled BP  
282 (<140/90 mmHg). A little over half of the patients (54%) were single, separated or widowed,  
283 almost half of the patients (47%) were employed and 199 (45%) of the patients had a tertiary or  
284 higher level of education. One hundred and forty-two (64%) patients had lived with a  
285 hypertension diagnosis for more than 5 years.

286 **Table 1. Patients Characteristics stratified by Blood Pressure Control Status (BP <140/90**  
287 **mmHg) Status, n (%) or mean (SD) (N = 224)**

| Patient level factors        | Total<br>N = 224 | Uncontrolled<br>N = 115 | Controlled<br>N = 109 | $p$ -value |
|------------------------------|------------------|-------------------------|-----------------------|------------|
| Age (years), mean (SD)       | 60.50 (12.7)     | 60.3 (11.3)             | 60.8 (14.0)           | 0.749      |
| Sex                          |                  |                         |                       |            |
| <i>Male</i>                  | 42 (18.7%)       | 21 (50%)                | 21 (50%)              | 0.847      |
| <i>Female</i>                | 182 (81.3%)      | 94 (51.7%)              | 88 (48.3%)            |            |
| Marital status               |                  |                         |                       |            |
| <i>Married or cohabiting</i> | 104 (46%)        | 50 (48%)                | 54 (52%)              | 0.363      |

|                                                   |                                     |              |                   |                   |       |
|---------------------------------------------------|-------------------------------------|--------------|-------------------|-------------------|-------|
|                                                   | <i>Single/Separated/widowed</i>     | 120 (54%)    | 65 (54%)          | 55 (46%)          |       |
| <b>Employment status</b>                          |                                     |              |                   |                   |       |
|                                                   | <i>Unemployed</i>                   | 94 (42%)     | 51 (54%)          | 43 (46%)          | 0.542 |
|                                                   | <i>Employed</i>                     | 106 (47%)    | 54 (51%)          | 52 (49%)          |       |
|                                                   | <i>Retired</i>                      | 24 (11%)     | 10 (42%)          | 14 (58%)          |       |
| <b>Education</b>                                  |                                     |              |                   |                   |       |
|                                                   | <i>Primary or less</i>              | 65 (29%)     | 35 (54%)          | 30 (46%)          | 0.869 |
|                                                   | <i>Secondary level</i>              | 59 (26%)     | 29 (49%)          | 30 (51%)          |       |
|                                                   | <i>Tertiary or higher</i>           | 199 (45%)    | 51 (51%)          | 49 (49%)          |       |
| <b>Duration with hypertension diagnosis</b>       |                                     |              |                   |                   |       |
|                                                   | <i>≤5 years</i>                     | 80 (36%)     | 40 (50%)          | 40 (50%)          | 0.762 |
|                                                   | <i>&gt; 5 years</i>                 | 142 (64%)    | 74 (51%)          | 68 (49%)          |       |
| <b>Travel duration to the health facility</b>     |                                     |              |                   |                   |       |
|                                                   | <i>&lt;30 minutes</i>               | 90 (40%)     | 41 (46%)          | 49 (54%)          | 0.125 |
|                                                   | <i>30 to &lt;1 hour</i>             | 110 (49%)    | 64 (58%)          | 46 (42%)          |       |
|                                                   | <i>≥1 hour</i>                      | 24 (11%)     | 10 (42%)          | 14 (58%)          |       |
| <b>Systolic Blood Pressure (mmHg), mean (SD)</b>  |                                     | 139 (20)     | 153 (17)          | 123 (10)          | 0.000 |
| <b>Diastolic Blood pressure (mmHg), mean (SD)</b> |                                     | 85 (13)      | 93 (11)           | 76 (8)            | 0.000 |
| <b>Compliance to High Blood Pressure Therapy</b>  |                                     |              | <b>Score (SD)</b> | <b>Score (SD)</b> |       |
|                                                   | Diet (3 items), mean (SD)           | 9.90 (1.66)  | 9.86 (1.63)       | 9.94 (1.70)       | 0.706 |
|                                                   | Medication (9 items), mean (SD)     | 33.36 (2.21) | 33.28 (2.39)      | 33.45 (2.01)      | 0.562 |
|                                                   | Appointment (2 items), mean (SD)    | 7.12 (1.18)  | 7.17 (1.12)       | 7.09 (1.25)       | 0.643 |
|                                                   | Overall score (14 items), mean (SD) | 50.39 (3.26) | 50.30 (3.01)      | 50.49 (3.52)      | 0.677 |

288  
289

290 The HB-HBP Scale mean scores ( $\pm$ SD) were: Overall, 50.39 (+3.26); medication adherence,  
291 33.36 (+2.21); appointment keeping, 7.12 (+1.18); and dietary sodium intake, 9.90 (+1.66).

292 There was no statically significant difference in binary comparison by BP control status with any  
293 of the measured variables

#### 294 Provider Characteristics

295 Healthcare providers (N = 67) were 32 (+7) years of age (Table 2). Most healthcare providers, 53  
296 (79%) were female, 40 (61%) had associate degree or less, and the majority, 61 (91%) were  
297 enrolled or registered nurses. Of the healthcare providers, 32 (48%) had 4 or more years of  
298 experience, 39 (59%) worked in general OPD, and 44 (66%) reported that they had received  
299 training on hypertension management in the previous 2 years.

#### 300 Table 2. Healthcare professional characteristics (n = 67)

| Characteristic                         | Number (%) |
|----------------------------------------|------------|
| Mean Hypertension Knowledge Score (SD) | 18.9 (1.9) |

|                                                           |                                                                    |
|-----------------------------------------------------------|--------------------------------------------------------------------|
| <b>Age in years, mean (SD)</b>                            | 32 (7)                                                             |
| <b>Sex</b>                                                |                                                                    |
|                                                           | <i>Male</i> 14 (21%)                                               |
|                                                           | <i>Female</i> 53 (79%)                                             |
| <b>Education (n = 66)</b>                                 |                                                                    |
|                                                           | <i>Associate degree or less</i> 40 (61%)                           |
|                                                           | <i>Bachelor's degree</i> 20 (30%)                                  |
|                                                           | <i>Post-graduate degree</i> 6 (9%)                                 |
| <b>Profession</b>                                         |                                                                    |
|                                                           | <i>Physician/Doctors</i> 6 (9%)                                    |
|                                                           | <i>Enrolled &amp; Registered Nurses</i> 55 (82%)                   |
|                                                           | <i>Other clinical care providers</i> 6 (9%)                        |
| <b>Experience</b>                                         |                                                                    |
|                                                           | <i>&lt; 2 years</i> 19 (28%)                                       |
|                                                           | <i>2 to &lt;4 years</i> 16 (24%)                                   |
|                                                           | <i>≥4 years</i> 32 (48%)                                           |
| <b>Health facility department</b>                         |                                                                    |
|                                                           | <i>Hypertension Clinic</i> 10 (15%)                                |
|                                                           | <i>General OPD</i> 39 (59%)                                        |
|                                                           | <i>Others</i> 17 (26%)                                             |
| <b>Received hypertension training in the last 2 years</b> |                                                                    |
|                                                           | <i>No</i> 23 (34%)                                                 |
|                                                           | <i>Yes</i> 44 (66%)                                                |
| <b>Type of hypertension treatment received (n = 44)</b>   |                                                                    |
|                                                           | <i>Job orientation</i> 13 (30%)                                    |
|                                                           | <i>On job training</i> 15 (34%)                                    |
|                                                           | <i>Professional certification program</i> 7 (16%)                  |
|                                                           | <i>Conference or other hypertension training workshops</i> 9 (20%) |

301

302

303 Health facility Characteristics

304 We conducted the study at 15 health facilities, among which almost half (47%) had less than 50-  
 305 bed capacity, and nearly half (47%) were government-owned (Table 3 and Table 4). Eight  
 306 (53%) of the health facilities managed patients in hypertension clinic; the remaining seven  
 307 managed them in the general OPD.

308

309 **Table 3. Characteristics of included health facilities in Ashanti Region, Ghana**

310 **(N = 15)**

| <b>Facility characteristics, n (%) or median (IQR)</b> | <b>Sites</b>                      |
|--------------------------------------------------------|-----------------------------------|
| <b>Facility size (by number of beds)</b>               |                                   |
|                                                        | <i>&lt;50 beds</i> 7 (47%)        |
|                                                        | <i>50 to &lt;100 beds</i> 5 (33%) |
|                                                        | <i>≥100 beds</i> 3 (20%)          |
| <b>Facility ownership</b>                              |                                   |
|                                                        | <i>Government</i> 7 (47%)         |



|                                                                                                                              |               |
|------------------------------------------------------------------------------------------------------------------------------|---------------|
| <i>Private</i>                                                                                                               | 5 (33%)       |
| <i>Christian Health Association of Ghana</i>                                                                                 | 3 (20%)       |
| <b>Patients treated in hypertension clinic</b>                                                                               |               |
| <i>No (General OPD only)</i>                                                                                                 | 7 (47%)       |
| <i>Yes</i>                                                                                                                   | 8 (53%)       |
| <b>Personnel and training on cardiovascular diseases' management</b>                                                         |               |
| Number of full-time nurses (registered and enrolled), median (IQR)                                                           | 35 (24-205)   |
| Number of full-time doctors (generalists and specialists), median (IQR)                                                      | 9 (5-17)      |
| Number of full-time paramedical clinicians, median (IQR)                                                                     | 2 (1-7)       |
| Patient/nurse ratio, media (IQR) – based on patient received in OPD last month                                               | 26 (19-46)    |
| Patient/physician ratio, media (IQR) – based on patient received in OPD last month                                           | 235 (139-388) |
| Number of facilities where at least one provider received training on cardiovascular diseases within the last 2 years, n (%) | 11 (73%)      |
| <b>Hypertension Service Readiness Indicators, n (%)</b>                                                                      |               |
| Hypertension guidelines <sup>0</sup>                                                                                         | 12 (80%)      |
| Patient education materials                                                                                                  | 9 (60%)       |
| At least one functional blood pressure measurement apparatus <sup>1</sup>                                                    | 15 (100%)     |
| Basic laboratory exams available <sup>2</sup>                                                                                | 11 (73%)      |
| All first line treatment medications available (n = 14) <sup>3</sup>                                                         | 9 (64%)       |
| At least one second line treatment medication available (n = 14) <sup>4</sup>                                                | 14 (100%)     |
| <b>Availability of Essential antihypertensive medications, n = 14 (%)</b>                                                    |               |
| Angiotensin converting enzyme inhibitor                                                                                      | 14 (100%)     |
| Angiotensin receptor blocker                                                                                                 | 13 (93%)      |
| Calcium channel blocker                                                                                                      | 14 (100%)     |
| Thiazide diuretic                                                                                                            | 9 (64%)       |
| Beta blocker                                                                                                                 | 11 (78%)      |
| Aldosterone antagonist                                                                                                       | 4 (28%)       |
| Central acting agent                                                                                                         | 12 (86%)      |
| Vasodilator                                                                                                                  | 10 (71%)      |
| Fixed dose combination                                                                                                       | 8 (57%)       |

Abbreviations: IQR – Interquartile Range; OPD – Outpatient Department.

<sup>0</sup>Considered the 2017 national treatment standards or 2021 cardiovascular diseases guidelines.

<sup>1</sup>Considered automatic Blood Pressure device or sphygmomanometer with stethoscope.

<sup>2</sup>Included 5 tests: valid dipstick for urine protein, urine glucose, and urine ketones; glucometer for blood glucose and valid test strips; and hemoglobinometer or analyzer for hemoglobin testing.

<sup>3</sup>First line treatment medications considered according to Ghana Protocol - Angiotensin Converting Enzyme Inhibitors, Angiotensin Receptor Blocker, Calcium Channel Blocker, Thiazide, and Beta Blocker.

<sup>4</sup>Second line treatment medications considered - Centrally Acting Agent; Vasodilators, and Aldosterone Antagonists.

311  
312  
313  
314

**Table 4. Health Facility Characteristics Grouped by Patient Blood Pressure Control Status of Included Patients, n (%) (N = 224)**

| Patient level factors             | Total<br>N=224 | Uncontrolled<br>N=115 | Controlled<br>N =109 | p-value |
|-----------------------------------|----------------|-----------------------|----------------------|---------|
| <b>Facility ownership</b>         |                |                       |                      |         |
| <i>Private</i>                    | 69 (31%)       | 33 (48%)              | 36 (52%)             | 0.659   |
| <i>Government</i>                 | 109 (49%)      | 56 (51%)              | 53 (49%)             |         |
| <i>CHAG</i>                       | 46 (20%)       | 26 (57%)              | 20 (43%)             |         |
| <b>Hypertension Clinic</b>        |                |                       |                      |         |
| <i>General OPD only</i>           | 101 (45%)      | 57 (56%)              | 44 (44%)             | 0.167   |
| <i>Yes</i>                        | 123 (55%)      | 58 (57%)              | 65 (53%)             |         |
| <b>Provider training</b>          |                |                       |                      |         |
| <i>No</i>                         | 53 (24%)       | 25 (47%)              | 28 (53%)             | 0.487   |
| <i>Yes</i>                        | 171 (76%)      | 90 (53%)              | 81 (47%)             |         |
| <b>Facility size by bed count</b> |                |                       |                      |         |

|                                                                                             |           |          |          |       |
|---------------------------------------------------------------------------------------------|-----------|----------|----------|-------|
| < 50 beds                                                                                   | 100 (45%) | 50 (50%) | 50 (50%) | 0.682 |
| 50 to < 100 beds                                                                            | 76 (34%)  | 42 (55%) | 34 (45%) |       |
| ≥ 100 beds                                                                                  | 48 (21%)  | 23 (48%) | 25 (52%) |       |
| <b>All first line medications available</b>                                                 |           |          |          |       |
| No                                                                                          | 67 (32%)  | 33 (49%) | 34 (51%) | 0.666 |
| Yes                                                                                         | 143 (68%) | 75 (52%) | 68 (48%) |       |
| <b>Patient to nurse ratio (patients per month per nurse)</b>                                |           |          |          |       |
| < 20                                                                                        | 76 (30%)  | 31 (46%) | 36 (54%) | 0.611 |
| 20 to <40                                                                                   | 99 (44%)  | 53 (54%) | 46 (46%) |       |
| ≥40                                                                                         | 58 (26%)  | 31 (53%) | 27 (47%) |       |
| <b>Patient to physician or physician assistant ratio (patients per month per clinician)</b> |           |          |          |       |
| < 140                                                                                       | 74 (33%)  | 31 (42%) | 43 (58%) | 0.095 |
| 140 to <280                                                                                 | 90 (40%)  | 53 (59%) | 37 (41%) |       |
| ≥280                                                                                        | 60 (27%)  | 31 (52%) | 29 (48%) |       |

315

316 Regarding the health facilities' hypertension service readiness indicators, 11 (73%) health  
317 facilities had at least one healthcare provider who received training on cardiovascular diseases  
318 within the last 2 years. Hypertension guidelines were available in 12 (80%) health facilities,  
319 patient education materials were available in nine (60%) health facilities, and all 15 (100%)  
320 health facilities had at least one functional BP measurement apparatus. The basic laboratory  
321 exams were available in 11 (73%) health facilities, and all first-line antihypertensive medications  
322 were available in nine (64%) of 14 health facilities assessed for medications availability. All 14  
323 (100%) health facilities had at least one second-line antihypertensive medication. Angiotensin-  
324 converting enzyme inhibitors were available in all 14 (100%) health facilities, and thiazide  
325 diuretics were the least available (observed in 9 or 64% of the 14 assessed health facilities) of  
326 the first-line antihypertensive medications. Of the second-line antihypertensive medications, a  
327 centrally acting agent category of drugs was the most available (observed in 12 or 86% of the  
328 14 assessed health facilities); aldosterone antagonist category was the least available  
329 (observed in 4 or 28% of the 14 assessed health facilities).

330 Patient-, provider-, and facility level predictors systolic and diastolic BP

331 *Patient-level predictors of systolic and diastolic BP and BP control*

332 The patients' educational level was associated with systolic BP while travel duration to the  
 333 health facility, and the overall HB-HBP scores were associated with diastolic BP. Having a  
 334 secondary level of education was associated with roughly 8 mmHg lower systolic BP  
 335 (Coefficient: -7.69; 95% CI: -15.13, -0.26) than having a primary or lower educational level  
 336 (Table 5). Additionally, travelling for an hour or more to the health facility was associated with  
 337 roughly 7 mmHg higher (Coefficient: 6.86; 95% CI: 0.92, 12.81) diastolic BP. Finally, a unit  
 338 increase in overall HB-HBP scores was associated with a ½ mmHg lower (Coefficient: -0.55,  
 339 95% CI: -1.09, -0.01) diastolic BP. In the HB-HBP sub-scores, a unit increase in the diet control  
 340 scores was associated with one unit lower (Coefficient: -1.11; 95% CI: -2.20, -0.02) diastolic BP  
 341 in mmHg.

342 **Table 5. Mixed-Effects Regression of Patient Factors of Systolic and Diastolic Blood**  
 343 **Pressure and Blood Pressure Control in Kumasi, Ghana (n = 221 patients, 15 health**  
 344 **facilities)**

|                                                  | Adjusted SBP<br>Coefficients, 95% CI* | Adjusted DBP<br>Coefficients, 95% CI* | Adjusted BP Control<br>OR, 95% CI* |
|--------------------------------------------------|---------------------------------------|---------------------------------------|------------------------------------|
| <b>Patient level factors</b>                     |                                       |                                       |                                    |
| <b>Employment status</b>                         |                                       |                                       |                                    |
| <i>Unemployed</i>                                | Ref.                                  | Ref.                                  | Ref.                               |
| <i>Employed</i>                                  | -5.25 (-11.83, 1.34)                  | -2.89 (-6.96, 1.19)                   | 1.31 (0.67, 2.57)                  |
| <i>Retired</i>                                   | -4.19 (-13.57, 5.2)                   | -3.41 (-9.24, 2.41)                   | 1.91 (0.73, 5.00)                  |
| <b>Education</b>                                 |                                       |                                       |                                    |
| <i>Primary or less</i>                           | Ref.                                  | Ref.                                  | Ref.                               |
| <i>Secondary level</i>                           | <b>-7.69 (-15.13, -0.26)</b> †        | -3.4 (-7.97, 1.16)                    | 1.29 (0.61, 2.76)                  |
| <i>Tertiary or higher</i>                        | -1.85 (-8.8, 5.09)                    | -1.78 (-6.07, 2.52)                   | 1.21 (0.6, 2.45)                   |
| <b>Travel duration to the health facility</b>    |                                       |                                       |                                    |
| <i>&lt;30 minutes</i>                            | Ref.                                  | Ref.                                  | Ref.                               |
| <i>30 to &lt;1 hour</i>                          | 3.1 (-2.7, 8.91)                      | <b>3.75 (0.12, 7.38)</b> †            | <b>0.51 (0.28, 0.92)</b> †         |
| <i>≥1 hour</i>                                   | 5.46 (-3.96, 14.87)                   | <b>6.86 (0.92, 12.81)</b> †           | 1.03 (0.4, 2.67)                   |
| <b>Compliance to High Blood Pressure Therapy</b> |                                       |                                       |                                    |
| <i>Diet (3 items) *1</i>                         | -0.47 (-2.22, 1.28)                   | <b>-1.11 (-2.20, -0.02)</b> †         | 0.99 (0.82, 1.18)                  |
| <i>Medication (9 items) *1</i>                   | -0.95 (-2.19, 0.29)                   | -0.72 (-1.49, 0.06)                   | 1.03 (0.91, 1.17)                  |
| <i>Appointment (2 items) *1</i>                  | 0.89 (-1.44, 3.23)                    | 0.51 (-0.97, 2.00)                    | 0.98 (0.78, 1.24)                  |
| <i>Overall score (14 items)</i>                  | -0.46 (-1.33, 0.41)                   | <b>-0.55 (-1.09, -0.01)</b> †         | 1.01 (0.92, 1.1)                   |

---

\*Adjusted for all other variables (except Hillbone treatment adherence sub scores) plus age, sex, marital status, and length of diagnosis | <sup>†</sup>Adjusted for all other variables (except other Hillbone treatment adherence sub scores and total score) plus age, sex, marital status, and length of diagnosis | SBP: Systolic Blood Pressure; DBP: Diastolic Blood Pressure | <sup>†</sup>Statistically significant (p<0.05)

---

345  
346 In the unadjusted and fully adjusted mixed-effects logistic regression models, only the duration of  
347 travel to the health facility remained significant. Patients who travelled 30 minutes to an hour to  
348 the health facility were two times less likely to have controlled BP than their counterparts who  
349 travelled less than 30 minutes (OR: 0.51; 95% CI: 0.28, 0.92).

#### 350 *Provider level predictors of BP outcomes*

351 Provider knowledge of hypertension guidelines was 18.9 (+1.9) on a 23-point scale. In  
352 association analyses, no provider characteristics were associated with the provider knowledge  
353 scores. Two-thirds (75% of the 64) of respondents reported being very or moderately familiar  
354 with hypertension treatment guidelines (Fig 1).

#### 355 **Fig 1. Self-reported familiarity with hypertension treatment guidelines among healthcare** 356 **providers in Kumasi, Ghana (n = 64)**

357  
358 Regarding the nurses' and other clinical staffs' (other than medical doctors) attitudes towards  
359 hypertension guidelines, almost 100% of the respondents were "very confident" in their  
360 adherence to the guidelines while measuring BP; roughly 80% were "very confident" in  
361 providing counselling on healthy lifestyles (Fig 2). Only half of the respondents were "very  
362 confident" in diagnosing hypertension, and even fewer, roughly 30%, were confident in  
363 prescribing antihypertensive medications. Overall, 75% of the nurses and other clinical staff  
364 (except medical doctors) were very confident in adhering to hypertension guidelines while  
365 managing patients with hypertension.

366 **Fig 2. Self-reported confidence in adhering to hypertension treatment guidelines among**  
 367 **nurses and other clinical staff (except medical doctors) in Kumasi, Ghana (n = 57)**

368  
 369 *Health facility level predictors of systolic and diastolic BP and BP control*

370 At the health facility level, the facility ownership and patient-to-physician or physician assistant  
 371 ratio predicted both systolic and diastolic BP and provider training showed association with  
 372 diastolic BP (Tables 6).

373 **Table 6. Mixed-Effects Linear Regression of Health Facility Factors of Systolic and**  
 374 **Diastolic Blood Pressure and Blood Pressure Control in Kumasi, Ghana (n = 221 patients,**  
 375 **15 health facilities)**

|                                                                                             | Adjusted SBP<br>Coefficients, 95% CI* | Adjusted DBP<br>Coefficients, 95% CI* | Adjusted BP<br>Control OR, 95%<br>CI* |
|---------------------------------------------------------------------------------------------|---------------------------------------|---------------------------------------|---------------------------------------|
| <b>Facility level factors</b>                                                               |                                       |                                       |                                       |
| <b>Facility ownership</b>                                                                   |                                       |                                       |                                       |
| <i>Private</i>                                                                              | Ref.                                  | Ref.                                  | Ref.                                  |
| <i>Government</i>                                                                           | <b>-19.4 (-33.58, -5.22) †</b>        | <b>-13.48 (-22.21, -4.76) †</b>       | 2.2 (0.49, 9.96)                      |
| <i>Christian Health Association of<br/>Ghana</i>                                            | <b>-23.25 (-39.98, -6.52) †</b>       | <b>-14.31 (-24.6, -4.01) †</b>        | 3.4 (0.58, 19.85)                     |
| <b>Hypertension Clinic</b>                                                                  |                                       |                                       |                                       |
| <i>General OPD only</i>                                                                     | Ref.                                  | Ref.                                  | Ref.                                  |
| <i>Yes</i>                                                                                  | -2.27 (-9.08, 4.53)                   | -2.4 (-6.59, 1.79)                    | 1.26 (0.61, 2.58)                     |
| <b>Provider training</b>                                                                    |                                       |                                       |                                       |
| <i>No</i>                                                                                   | Ref.                                  | Ref.                                  | Ref.                                  |
| <i>Yes</i>                                                                                  | 6.4 (-3.65, 16.45)                    | <b>6.8 (0.62, 12.98) †</b>            | 0.38 (0.13, 1.10)                     |
| <b>Facility size by bed count</b>                                                           |                                       |                                       |                                       |
| <i>&lt;50 beds</i>                                                                          | Ref.                                  | Ref.                                  | Ref.                                  |
| <i>50 to &lt;100 beds</i>                                                                   | 1.48 (-11.15, 14.12)                  | 0.81 (-6.96, 8.59)                    | 0.67 (0.18, 2.49)                     |
| <i>≥100 beds</i>                                                                            | -4.06 (-17.75, 9.63)                  | -0.62 (-9.05, 7.8)                    | 1.54 (0.37, 6.51)                     |
| <b>All first line medications available</b>                                                 |                                       |                                       |                                       |
| <i>No</i>                                                                                   | Ref.                                  | Ref.                                  | Ref.                                  |
| <i>Yes</i>                                                                                  | -5.25 (-17.51, 7.01)                  | -1.06 (-8.61, 6.48)                   | 1.6 (0.43, 5.89)                      |
| <b>Patient to nurse ratio (patients per month per nurse)</b>                                |                                       |                                       |                                       |
| <i>&lt;20</i>                                                                               | Ref.                                  | Ref.                                  | Ref.                                  |
| <i>20 to &lt;40</i>                                                                         | -6.1 (-16.95, 4.76)                   | -5.35 (-12.03, 1.33)                  | 1.3 (0.42, 4.08)                      |
| <i>≥40</i>                                                                                  | -1.72 (-12.5, 9.06)                   | -3.34 (-9.98, 3.29)                   | 0.93 (0.3, 2.88)                      |
| <b>Patient to physician or physician assistant ratio (patients per month per clinician)</b> |                                       |                                       |                                       |
| <i>&lt;140</i>                                                                              | Ref.                                  | Ref.                                  | Ref.                                  |
| <i>140 to &lt;280</i>                                                                       | <b>23.06 (10.06, 36.05) †</b>         | <b>15.52 (7.53, 23.52) †</b>          | <b>0.18 (0.05, 0.74) †</b>            |
| <i>≥280</i>                                                                                 | <b>27.24 (6.59, 47.88) †</b>          | <b>12.83 (0.12, 25.53) †</b>          | 0.27 (0.03, 2.38)                     |

\*Adjusted for all other variables plus age, sex, education, employment status; OPD: Outpatient Department; SBP: Systolic Blood Pressure; DBP: Diastolic Blood Pressure.

†Statistically significant (p<0.05)

376  
 377 Compared to private health facilities, receiving care at government health facilities was  
 378 associated with a 19 mmHg (Coefficient: -19.4; 95% CI: -33.58, -5.22) and 13 mmHg

379 (Coefficient: -13.48; 95% CI: -22.21, -4.76) lower systolic and diastolic BP, respectively, and  
380 receiving care at CHAG health facilities was associated with a 23 mmHg (Coefficient: -23.25;  
381 95% CI: -39.98, -6.52) and 14 mmHg (Coefficient: -14.31; 95% CI: -24.6, -4.01) lower systolic  
382 and diastolic BP, respectively.

383 Receiving care at health facilities where a physician or physician assistant consulted 140 to 280  
384 patients per month in OPD was associated with a 23 mmHg (Coefficient: 23.06 95% CI: 10.06,  
385 36.05) and 15 mmHg (Coefficient: 15.52; 95% CI: 7.53, 23.52) higher systolic and diastolic BP,  
386 respectively, than where those clinicians consulted less than 140 patients per month in OPD. At  
387 facilities where a physician or physician assistant consulted 280 or more patients per month,  
388 there was a 27 mmHg (Coefficient: 23.06 95% CI: 10.06, 36.05) average higher systolic BP.

389 Oddly, patients at health facilities that reported having at least one provider who received  
390 training in cardiovascular diseases in the last 2 years had a 7 mmHg higher diastolic BP  
391 (Coefficient: 6.8; 95% CI: 0.62, 12.98).

392 In the unadjusted and fully adjusted mixed-effects logistic regression models, patient-to-  
393 physician or physician assistant ratio (at the health facility level) predicted the patients' BP  
394 control status (Table 6). Patients receiving care at health facilities where a physician or physician  
395 assistant consulted 140 to 280 patients per month were five times less likely (OR: 0.18; 95% CI:  
396 0.05, 0.74) to have controlled BP than those who received care where a physician or physician  
397 assistant consulted less than 140 patients per month.

## 398 Discussion

399 The purpose of this study was to explore the health facility readiness for hypertension  
400 management and assess the patient-, provider-, and health facility-level factors of systolic and

401 diastolic BP and BP control in Ghana. Most health facilities had at least one trained provider, had  
402 hypertension guidelines, BP measurement equipment, and basic laboratory exams. Conversely,  
403 the availability of patient educational materials and all first-line antihypertensive medications  
404 was sub-optimal. We found that nearly half of the patient participants had a controlled BP.  
405 Patients' education, travel duration to the health facility, and adherence to treatment predicted  
406 BP outcomes. Providers had high knowledge of hypertension guidelines and reported being very  
407 confident in their adherence to those guidelines in practice. At health facility level, the facility  
408 ownership, the patient-to-physician or physician assistant ratio, and provider training predicted  
409 the patient BP outcomes.

410 Our findings are comparable to the findings of the 2019 May Measurement Month conducted in  
411 Kumasi, Ashanti Region, Ghana [29]. In that study, 49% of the patients on treatment for  
412 hypertension had a controlled BP [29]. Different studies, however, have reported slightly  
413 different levels of controlled BP among patients on hypertension treatment. The 2018 May  
414 Measurement Month conducted in Ashanti Region reported a 32% controlled BP among patients  
415 on hypertension treatment [30]. A different community-based study conducted in Bono Region  
416 reported a 41% BP control [31], and a study which recruited patients from two hospitals in  
417 greater Accra reported a 23% BP control level [32]. It is, however, necessary to understand that  
418 only 30% of patients aware of their hypertension status are initiated on treatment, bringing the  
419 overall estimate of people with hypertension with controlled BP down to 6% [3].

420 Patients with a secondary education had roughly 8 mmHg lower systolic BP than their  
421 counterparts with primary or lower level of education. These findings are similar to those of the  
422 previous literature. In a study conducted in Accra, patients with junior high and secondary  
423 education had 3 times the odds of controlled BP than patients with no formal education [32]. The

424 level of education is one of the indicators of socio-determinants of health where higher education  
425 is often associated with higher socioeconomic status, social networks, and access to better  
426 quality of healthcare. Studies in different SSA countries demonstrate a relationship, often  
427 mediated by body mass index, between wealth and hypertension, where higher socioeconomic  
428 status is often associated with poor BP outcomes (higher BP) [33–35]. In the analysis of the  
429 2014 Demographic and Health Survey data in Ghana, Amegah and Nayha (2018) demonstrated  
430 that higher educational attainment attenuated the relationship between wealth and BP [33]. In  
431 their analysis, affluent people with primary education had up to 8 times higher odds of elevated  
432 BP than their poorest counterparts while there was no association between wealth and BP status  
433 among people with a university degree [33]. However, poor and less educated people are at  
434 increased risk for poor BP outcomes, as demonstrated by a study conducted in eight SSA  
435 countries [36]. In that multinational study, individuals with low wealth index in both low- and  
436 middle-income countries (LMICs) had 88% higher odds of uncontrolled BP than their  
437 counterparts with higher wealth index [36]. Interventions for addressing hypertension will have  
438 to include specific measures for socioeconomically disadvantaged populations.

439 We found that travelling for an hour or more to the health facility for hypertension care was  
440 associated with roughly 7 mmHg higher diastolic BP. The distance of travel to the health facility  
441 is an important factor of health services accessibility and utilization [37]. The international  
442 standards specify that 80% of a given country's population should have access to a hospital  
443 within 2 hours of walking distance for a timely management of emergencies. Yet, the literature  
444 lacks consistency as to which practical distance or travel time from the health center is associated  
445 with optimally good health outcomes. Some studies suggest 30 minutes from health centers,  
446 others 45 minutes, and others consider one hour as the cap for living in the served radius of a



447 community health center [38–40]. The 2019 Ghana Living Standards Survey reported that on  
448 average 20% of people in Ghana travelled more than an hour to the nearest health facility [41],  
449 and another study reported that 14% of the population in Ghana travel more than two hours to  
450 any nearest public hospital [42]. One significant challenge with hypertension care in Ghana is the  
451 lack of emphasis on strengthening hypertension care services at the community-level health  
452 facilities [43]. Since there are no guidelines and enforcement of systems for managing or  
453 following up patients with hypertension at the low levels of the health systems (community-level  
454 health facilities), and systems such as mobile clinics or digital healthcare are absent, patients  
455 must travel long distances to hospitals for their regular hypertension follow-up appointments  
456 [43]. On the hospital side, the patient overload leads to quicker depletion of resources, longer  
457 waiting times, and the overall poor quality of services, hence poor health outcomes. In a  
458 similarly low-income SSA country, Rwanda, a study demonstrated that after removing the  
459 distance barriers of care access through the decentralization of hypertension care services to  
460 community health centers, there was no significant difference in achieving BP targets between  
461 patients followed up at the district hospitals versus community health centers [44]. Strategies for  
462 improving the geographical access of hypertension services are very much needed in Ghana.

463 In the current study, we found that higher hypertension treatment adherence scores were  
464 associated with lower diastolic BP. These findings corroborate the previous literature. In their  
465 study, Sarfo and colleagues (2020) showed that each one-unit increase in the scores of adherence  
466 to treatment was associated with a quarter unit decline in diastolic BP and a 3% higher odds of  
467 BP control [45]. Multiple factors at the patient-, provider-, and health facility level influence the  
468 patient adherence to treatment. At the patient-level, the forgetfulness, alcohol consumption and  
469 smoking behaviors, and the lack of motivation with the understanding that hypertension is a

470 chronic condition requiring ongoing treatment are some of the reasons that hinder compliance to  
471 treatment [46,47]. The provider factors include the competence in educating patients on their  
472 health situation and the goal for treatment, and their own knowledge on hypertension could  
473 influence patients' adherence to treatment. At the health facility and health systems level, the  
474 availability, accessibility and affordability of the medications have been expressed as major  
475 barriers to patients' adherence to treatment [46]. The success of any strategy to manage  
476 hypertension will in many ways require finding measures for addressing factors of non-  
477 compliance with hypertension treatment.

478 Healthcare providers had high knowledge scores on hypertension guidelines and reported a high  
479 overall self-confidence in adhering to guidelines on tasks that were in their scope of practice.

480 While there is limited literature on healthcare providers' objective knowledge of hypertension  
481 guidelines, extensive literature exists about healthcare providers' perceptions on barriers to  
482 hypertension management in Ghana—alluding more to their lack of knowledge on hypertension  
483 and the need for more training [48,49]. A qualitative interview with healthcare providers at  
484 community health centers in the Upper East Region of Ghana reported that providers felt that  
485 they had inadequate knowledge on cardiovascular disease screening, treatment, and prescribing  
486 medications for cardiovascular diseases, and expressed the need for regular training sessions,  
487 workshops, and mentorship opportunities on cardiovascular diseases management [43]. In our  
488 findings, many health facilities reported that at least one healthcare provider had received  
489 training on hypertension management within two years, which could explain our findings of  
490 higher knowledge scores and confidence. Yet, the training did not translate to better BP  
491 outcomes. In our assessment, the most common type of training available for healthcare  
492 providers was the job orientation for new hires. We think that the low patients' outcomes among

493 facilities with trained providers could be explained by the new and unexperienced healthcare  
494 providers. Beyond provider training, however, there should be a system for flagging patients  
495 with uncontrolled BP to identify patient-specific support measures to help them better adhere to  
496 healthy behaviors and prescribed medications. More studies exploring the healthcare providers'  
497 knowledge are needed to help strategize the needed content areas to cover while training  
498 healthcare providers in cardiovascular diseases management. Finally, the structured training  
499 accompanied with mentoring could be necessary to ensure that the acquired knowledge  
500 appropriately translated to practice, hence better patients outcomes.

501 We found that at facilities where a physician or physician assistant consulted 280 or more  
502 patients per month, patients had an average of 27-mmHg higher systolic BP and were five times  
503 less likely to have controlled BP. These findings speak to the shortage of healthcare providers,  
504 especially those in charge of doing consultation and prescribing medications for patients with  
505 hypertension (physicians, and physician assistants) and the associated poor BP outcomes. With a  
506 long queue of patients outside, the physician or physician assistant can only rush through the  
507 consultation, hence lacking adequate time to appropriately assess the patient needs to adjust the  
508 treatment accordingly. Like in many other LMICs, Ghana health policy still does not permit  
509 nurses to independently diagnose and prescribe antihypertensive medications [43,50]. Multiple  
510 studies have successfully trained nurses to diagnose hypertension and prescribe medications and  
511 patients have been very receptive of this approach [43,49,51,52]. Yet, practical and policy  
512 challenges continue to impede the implementation of task-shifting strategy. Amid the challenges  
513 of maintaining the high numbers of medical doctors and physicians, the next best approach will  
514 be for policymakers to refer to the existing evidence and quickly institute and reinforce a policy

515 on training nurses to manage hypertension, including the diagnosis and prescription of  
516 antihypertensive medications.

517 We found that receiving care at private health facilities was associated with poor BP outcomes.  
518 These findings are counterintuitive, given that most of private health facilities are created  
519 because of inefficiencies in public health facilities and are often reported to have shorter wait  
520 times, better patient-provider relationships, and higher overall user satisfaction [53]. While it is  
521 not very clear why hypertension care in private health facilities is associated with poor outcomes,  
522 a few elements could offer some explanations. One strategy that has shown to be effective in  
523 hypertension management is team-based care—where healthcare professionals collaborate to  
524 manage patients with hypertension [54]. Yet, to minimize expenses, private health facilities de-  
525 emphasize the need to hire all key healthcare professionals such as pharmacists, dieticians,  
526 community health workers and others. Further, many private health facilities may not have the  
527 financial capacity to employ full-time cardiologists or medical doctors, while public health  
528 facilities may have them in addition to the other allied health professionals who are essential in  
529 team-based hypertension management.

530 Another key aspect of care in private versus public health facilities is the cost of care. The cost of  
531 care and the patient out-of-pocket spending are usually higher in private than government or  
532 quasi-governmental health facilities facilities [53]. The high cost of care makes it that poor  
533 people cannot attend private health facilities, but even the so-called wealthy might not be rich  
534 enough to afford the care and associated costs. Looking for ways to cut spending, patients could  
535 opt for poor utilization of health services or not purchasing some medications, hence leading to  
536 poor BP health outcomes. Like public health facilities, many private health facilities in Ghana  
537 provide services to patients insured by the National Health Insurance Scheme (NHIA). Yet,

538 previous literature has highlighted challenges with the NHIA, including major delays in  
539 reimbursements that impede timely programming and health planning, especially in private  
540 health facilities, which rely solely on these funds for all facility activities [40,43]. These lead to  
541 poor access to medications and other key equipment and justification of higher out-of-pocket  
542 charges that impact patients' outcomes.

543 Our study comes with some limitations. First, with the use of cross-sectional design, we could  
544 not longitudinally assess the change in BP or achievement of BP control and associated patient-,  
545 provider-, and facility-level factors. Second, our study was conducted at a small number of  
546 health facilities, which did not allow sufficient statistical power to detect small associations  
547 between facility-level predictors with the outcomes of interest. Third, in Ghana and many other  
548 countries in SSA, there are no systems for patients to maintain one primary healthcare provider,  
549 hence, we could not link patients' outcomes with individual healthcare providers. We hence  
550 aggregated variables of provider-level characteristics, knowledge scores, and self-reported  
551 adherence to hypertension guidelines but could not link them directly to patients' BP outcomes.  
552 Additionally, some assessments of the patient- and provider-level predictors were based on self-  
553 reported measures which could be associated with recall and social desirability bias. Last, the  
554 Service Availability and Readiness Assessment tool we used to measure health facility data has  
555 not been extensively utilized in other settings to measure hypertension service readiness, which  
556 limits comparison of findings across studies and settings. Despite the listed limitations, our study  
557 has major strengths in that it incorporates a broader viewpoint (from patient up to the facility-  
558 level) on the factors associated with hypertension service provision and patients' BP outcomes.  
559 This study provides data that is vital to entities looking to explore the multi-level factors of

560 hypertension care and outcomes at a broader scale or looking to implement interventions for  
561 hypertension management.

## 562 CONCLUSION

563 In conclusion, hypertension control among patients with hypertension on treatment is low.  
564 Patients' education and access to treatment, facility type of management, and provider density  
565 are associated with BP outcomes. Providers expressed high confidence in adhering to guidelines,  
566 but provider training was associated with poor outcomes, highlighting the lack of experience in  
567 hypertension management. Interventions targeting the patient-, provider-, and health system-  
568 levels will be needed to successfully address the hypertension burden. A large-scale study  
569 exploring the patient, provider, health facilities, and overall system factors of hypertension care  
570 and outcomes is needed. Specifically, larger studies should explore hypertension services  
571 accessibility, provider knowledge to guide curriculum development, nurse-to-patient ratio, and  
572 overall health facility hypertension readiness characteristics on patients' BP outcomes

## 573 Declarations

### 574 **Ethics Statement**

575 This study was approved by the committee on human research, publication, and ethics at Kwame  
576 Nkrumah University of Science and Technology – School of Medicine and Dentistry (Ref:  
577 CHRPE/AP/021/22) and the Johns Hopkins Medicine Institutional Review Board  
578 (IRB00218586). After securing the ethics committee approvals, we secured signed memoranda  
579 of understanding with each participating health facility detailing the study procedures, timelines,

580 and potential individuals to be invited in the study. All patients and healthcare providers signed  
581 informed paper and electronic consent, respectively, prior to participating in the study.

## 582 **Funding Statement**

583 SB received the following funding to conduct this project: (1) Discovery and Innovation Fund by  
584 Johns Hopkins School of Nursing [2021], (2) Johns Hopkins Provosts' Travel and Research  
585 Award [2021-2022], (3) Johns Hopkins Provosts' Dissertation Completion Award [2021-2022],  
586 (4) Global Health Established Field Placement Travel Grant offered by the Johns  
587 Hopkins Bloomberg School of Public Health [2021], and (5) Joana and Bill Conway Scholarship  
588 [2019-2022]. The content is solely the responsibility of the authors and does not necessarily  
589 represent the official views of any of the funders. The funding sources had no role in the  
590 development of this manuscript.

## 591 **Acknowledgment**

592 We thank all the health facilities in Kumasi Ghana, healthcare providers, and patients who  
593 participated in the ADHINCRA study.  
594

## 595 References

- 596 1. Guwatudde D, Nankya-Mutyoba J, Kalyesubula R, Laurence C, Adebamowo C, Ajayi IO,  
597 et al. The burden of hypertension in sub-Saharan Africa: A four-country cross sectional  
598 study. *BMC Public Health*. 2015;15: 1211. doi:10.1186/s12889-015-2546-z
- 599 2. World Health Organization (WHO). Hypertension Fact Sheet. 2019 [cited 15 Apr 2020].  
600 Available: <https://www.who.int/news-room/fact-sheets/detail/hypertension>
- 601 3. Bosu WK, Bosu DK. Prevalence, awareness and control of hypertension in Ghana: A  
602 systematic review and meta-analysis. *PLoS ONE*. 2021.  
603 doi:10.1371/journal.pone.0248137
- 604 4. Nyaaba GN, Stronks K, de-Graft Aikins A, Kengne AP, Agyemang C. Tracing Africa's  
605 progress towards implementing the Non-Communicable Diseases Global action plan  
606 2013-2020: a synthesis of WHO country profile reports. *BMC Public Health*. 2017;17:  
607 297. doi:10.1186/s12889-017-4199-6
- 608 5. Iwelunmor J, Plange-Rhule J, Airhihenbuwa CO, Ezepue C, Ogedegbe O. A Narrative  
609 Synthesis of the Health Systems Factors Influencing Optimal Hypertension Control in  
610 Sub-Saharan Africa. *PLoS One*. 2015;10: e0130193–e0130193.  
611 doi:10.1371/journal.pone.0130193
- 612 6. Nulu S, Aronow WS, Frishman WH. Hypertension in Sub-Saharan Africa: A Contextual  
613 View of Patterns of Disease, Best Management, and Systems Issues. *Cardiol Rev*.  
614 2016;24: 30–40. doi:10.1097/CRD.0000000000000083
- 615 7. Whelton PK, Carey RM, Aronow WS, Casey DE, Collins KJ, Himmelfarb CD, et al. 2017  
616 ACC/AHA/AAPA/ABC/ACPM/AGS/APhA/ASH/ASPC/NMA/PCNA Guideline for the



- 617 Prevention, Detection, Evaluation, and Management of High Blood Pressure in Adults. *J*  
618 *Am Coll Cardiol*. 2018;71: e127 LP-e248. doi:10.1016/j.jacc.2017.11.006
- 619 8. James PA, Oparil S, Carter BL, Cushman WC, Dennison-Himmelfarb C, Handler J, et al.  
620 2014 Evidence-Based Guideline for the Management of High Blood Pressure in Adults:  
621 Report From the Panel Members Appointed to the Eighth Joint National Committee (JNC  
622 8). *JAMA*. 2014;311: 507–520. doi:10.1001/jama.2013.284427
- 623 9. Unger T, Borghi C, Charchar F, Khan NA, Poulter NR, Prabhakaran D, et al. 2020  
624 International Society of Hypertension Global Hypertension Practice Guidelines.  
625 *Hypertension*. 2020;75: 1334–1357. doi:10.1161/HYPERTENSIONAHA.120.15026
- 626 10. Jeemon P, Séverin T, Amodeo C, Balabanova D, Campbell NRC, Gaita D, et al. World  
627 heart federation roadmap for hypertension – A 2021 update. *Glob Heart*. 2021;16: 63.  
628 doi:10.5334/GH.1066/METRICS/
- 629 11. Suzuki Y, Kaneko H, Yano Y, Okada A, Matsuoka S, Fujiu K, et al. Reduction in blood  
630 pressure for people with isolated diastolic hypertension and cardiovascular outcomes. *Eur*  
631 *J Prev Cardiol*. 2022 [cited 10 Jan 2023]. doi:10.1093/EURJPC/ZWAC278
- 632 12. Flint AC, Conell C, Ren X, Banki NM, Chan SL, Rao VA, et al. Effect of Systolic and  
633 Diastolic Blood Pressure on Cardiovascular Outcomes. *New England Journal of Medicine*.  
634 2019;381: 243–251.  
635 doi:10.1056/NEJMOA1803180/SUPPL\_FILE/NEJMOA1803180\_DISCLOSURES.PDF
- 636 13. Chaix B, Bean K, Leal C, Thomas F, Havard S, Evans D, et al. Individual/neighborhood  
637 social factors and blood pressure in the RECORD Cohort Study: which risk factors  
638 explain the associations? *Hypertension*. 2010;55: 769–75.  
639 doi:10.1161/HYPERTENSIONAHA.109.143206

- 640 14. Wagner EH. Chronic disease management: what will it take to improve care for chronic  
641 illness? Effective clinical practice : ECP. United States; 1998. pp. 2–4.
- 642 15. Owusu MF, Basu A, Barnett P. Hypertension and diabetes management: a policy  
643 perspective from Ghana. *J Health Organ Manag.* 2018/11/09. 2019;33: 35–50.  
644 doi:10.1108/JHOM-03-2018-0076
- 645 16. World Health Organization (WHO). Monitoring the Building Blocks of Health Systems:  
646 A handbook of indicators and their measurement strategies. World Health Organization.  
647 Geneva; 2010. doi:10.1146/annurev.ecolsys.35.021103.105711
- 648 17. Ahafo B, Accra G, East U, West U, Executives C, Comity T, et al. Ghana Districts - A  
649 repository of all districts in the republic of Ghana. 2012; 2–3.
- 650 18. Ghana Statistical Service. Population by Regions. 2019 [cited 18 Nov 2020].  
651 doi:10.1128/AAC.03728-14
- 652 19. Ghana Statistical Service. Kumasi metropolitan. 2010; 92.
- 653 20. Ghana Open data initiative. Health Facilities | Ghana Open Data Initiative. 2016 [cited 16  
654 Jun 2020]. Available: [https://data.gov.gh/dataset/health-facilities-ghana/resource/aa5b8e2f-a2e7-4aa6-9fef-cc31e1d1aa90#%7Bquery:%7Bfilters:\[%7Btype:!term,field:!Region,term:!ashanti%7D\]%7D,view-graph:%7BgraphOptions:%7Bhooks:%7BprocessOffset:%7B%7D,bindEvents:%7B%7D%7D%7D%7D](https://data.gov.gh/dataset/health-facilities-ghana/resource/aa5b8e2f-a2e7-4aa6-9fef-cc31e1d1aa90#%7Bquery:%7Bfilters:[%7Btype:!term,field:!Region,term:!ashanti%7D]%7D,view-graph:%7BgraphOptions:%7Bhooks:%7BprocessOffset:%7B%7D,bindEvents:%7B%7D%7D%7D%7D),
- 655  
656  
657  
658  
659
- 660 21. Cuschieri S. The STROBE guidelines. *Saudi J Anaesth.* 2019;13: S31.  
661 doi:10.4103/SJA.SJA\_543\_18

- 662 22. Muntner P, Shimbo D, Carey RM, Charleston JB, Gaillard T, Misra S, et al. Measurement  
663 of Blood Pressure in Humans: A Scientific Statement From the American Heart  
664 Association. *Hypertension*. 2019;73: E35–E66. doi:10.1161/HYP.000000000000087
- 665 23. NATIONAL GUIDELINES FOR THE MANAGEMENT OF CARDIOVASCULAR  
666 DISEASES First Edition. Accra; 2019.
- 667 24. Kim MT, Hill MN, Bone LR, Levine DM. Development and testing of the Hill-Bone  
668 Compliance to High Blood Pressure Therapy Scale. *Prog Cardiovasc Nurs*. 2000;15: 90–  
669 96. doi:10.1111/J.1751-7117.2000.TB00211.X
- 670 25. Baldridge A, Orji A, Omitiran K, Guo M, Ajisegiri S, Ojo T, et al. Capacity and Site  
671 Readiness for Hypertension Control Program Implementation in the Federal Capital  
672 Territory of Nigeria: A Cross-Sectional Study. *Health Serv Res*. 2020;55: 67–67.  
673 doi:10.1111/1475-6773.13421
- 674 26. National Standard Treatment Guidelines 7th Edition. Accra; 2017. Available:  
675 <https://www.moh.gov.gh/wp-content/uploads/2020/07/GHANA-STG-2017-1.pdf>
- 676 27. Ministry of Health Ghana National Drugs Programme (GNDP) - Essential Medicines List  
677 7th Edition. Accra; 2017. Available: [https://www.moh.gov.gh/wp-](https://www.moh.gov.gh/wp-content/uploads/2020/07/GHANA-EML-2017.pdf)  
678 [content/uploads/2020/07/GHANA-EML-2017.pdf](https://www.moh.gov.gh/wp-content/uploads/2020/07/GHANA-EML-2017.pdf)
- 679 28. Sarfo F, Treiber F, Gebregziabher M, Adamu S, Patel S, Nichols M, et al. PINGS (Phone-  
680 Based Intervention Under Nurse Guidance After Stroke): Interim Results of a Pilot  
681 Randomized Controlled Trial. *Stroke*. 2017/12/08. 2018;49: 236–239.  
682 doi:10.1161/STROKEAHA.117.019591
- 683 29. Tannor EK, Nyarko OO, Adu-Boakye Y, Owusu Konadu S, Opoku G, Ankobea-Kokroe  
684 F, et al. Prevalence of Hypertension in Ghana: Analysis of an Awareness and Screening

- 685 Campaign in 2019. <https://doi.org/10.1177/11795468221120092>. 2022;16.  
686 doi:10.1177/11795468221120092
- 687 30. Tannor EK, Nyarko OO, Adu-Boakye Y, Owusu Konadu S, Opoku G, Ankobea-Kokroe  
688 F, et al. Burden of hypertension in Ghana – Analysis of awareness and screening  
689 campaign in the Ashanti Region of Ghana. *JRSM Cardiovasc Dis*. 2022;11:  
690 204800402210755. doi:10.1177/20480040221075521
- 691 31. Dosoo DK, Nyame S, Enuameh Y, Ayetey H, Danwonno H, Twumasi M, et al.  
692 Prevalence of Hypertension in the Middle Belt of Ghana: A Community-Based Screening  
693 Study. *Int J Hypertens*. 2019;2019. doi:10.1155/2019/1089578
- 694 32. Okai DE, Manu A, Amoah EM, Laar A, Akamah J, Torpey K. Patient-level factors  
695 influencing hypertension control in adults in Accra, Ghana. *BMC Cardiovasc Disord*.  
696 2020;20. doi:10.1186/S12872-020-01370-Y
- 697 33. Amegah AK, Näyhä S. Educational attainment modifies the association of wealth status  
698 with elevated blood pressure in the Ghanaian population. *Heliyon*. 2018;4: 711.  
699 doi:10.1016/J.HELIYON.2018.E00711
- 700 34. Banchani E, Tenkorang EY, Midodzi W. Examining the effects of individual and  
701 neighbourhood socioeconomic status/wealth on hypertension among women in the  
702 Greater Accra Region of Ghana. *Health Soc Care Community*. 2022;30: 714–725.  
703 doi:10.1111/HSC.13185
- 704 35. Mustapha A, Ssekasanvu J, Chen I, Grabowski MK, Ssekubugu R, Kigozi G, et al.  
705 Hypertension and Socioeconomic Status in South Central Uganda: A Population-Based  
706 Cohort Study. *Glob Heart*. 2022;17. doi:10.5334/GH.1088/METRICS/

- 707 36. Antignac M, Diop IB, de Terline DMQ, Kramoh KE, Balde DM, Dzudie A, et al.  
708 Socioeconomic status and hypertension control in sub-saharan Africa the multination  
709 EIGHT study (evaluation of hypertension in Sub-Saharan Africa). *Hypertension*. 2018;71:  
710 577–584. doi:10.1161/HYPERTENSIONAHA.117.10512
- 711 37. Sarkodie AO. The effect of the price of time on healthcare provider choice in Ghana.  
712 *Humanities and Social Sciences Communications* 2022 9:1. 2022;9: 1–7.  
713 doi:10.1057/s41599-022-01282-6
- 714 38. dos Anjos Luis A, Cabral P. Geographic accessibility to primary healthcare centers in  
715 Mozambique. *Int J Equity Health*. 2016;15: 1–13. doi:10.1186/S12939-016-0455-0
- 716 39. Stock R. Distance and the utilization of health facilities in rural Nigeria. *Soc Sci Med*.  
717 1983;17: 563–570. doi:10.1016/0277-9536(83)90298-8
- 718 40. Koduah A, Nonvignon J, Colson A, Kurdi A, Morton A, van der Meer R, et al. Health  
719 systems, population and patient challenges for achieving universal health coverage for  
720 hypertension in Ghana. *Health Policy Plan*. 2021;36. doi:10.1093/heapol/czab088
- 721 41. Ghana Statistical Service. *Ghana Living Standards Survey (GLSS)*. Accra; 2019 Jun.
- 722 42. Ouma PO, Maina J, Thurania PN, Macharia PM, Alegana VA, English M, et al. Access  
723 to emergency hospital care provided by the public sector in sub-Saharan Africa in 2015: a  
724 geocoded inventory and spatial analysis. *Lancet Glob Health*. 2018;6: e342–e350.  
725 doi:10.1016/S2214-109X(17)30488-6
- 726 43. Laar AK, Adler AJ, Kotoh AM, Legido-Quigley H, Lange IL, Perel P, et al. Health system  
727 challenges to hypertension and related non-communicable diseases prevention and  
728 treatment: Perspectives from Ghanaian stakeholders. *BMC Health Serv Res*. 2019;19: 1–  
729 13. doi:10.1186/S12913-019-4571-6/TABLES/1

- 730 44. Ngoga G, Park PH, Borg R, Bukhman G, Ali E, Munyaneza F, et al. Outcomes of  
731 decentralizing hypertension care from district hospitals to health centers in Rwanda,  
732 2013–2014. *Public Health Action*. 2019;9: 142. doi:10.5588/PHA.19.0007
- 733 45. Sarfo FS, Mobula L, Plange-Rhule J, Gebregziabher M, Ansong D, Sarfo-Kantanka O, et  
734 al. Longitudinal control of blood pressure among a cohort of Ghanaians with  
735 hypertension: A multicenter, hospital-based study. *The Journal of Clinical Hypertension*.  
736 2020;22: 949. doi:10.1111/JCH.13873
- 737 46. Woode E, Boakye-Gyasi E, Obirikorang Y, Adu EA, Obirikorang C, Acheampong E, et  
738 al. Predictors of medication nonadherence among hypertensive clients in a Ghanaian  
739 population: Application of the Hill-Bone and Perceived Barriers to Treatment Compliance  
740 Scale. *Health Sci Rep*. 2022;5: e584. doi:10.1002/HSR2.584
- 741 47. Sarkodie E, Afriyie DK, Hutton-Nyameaye A, Amponsah SK. Adherence to drug therapy  
742 among hypertensive patients attending two district hospitals in Ghana. *Afr Health Sci*.  
743 2020;20: 1355. doi:10.4314/AHS.V20I3.42
- 744 48. De-Graft Aikins A, Kushitor M, Koram K, Gyamfi S, Ogedegbe G. Chronic non-  
745 communicable diseases and the challenge of universal health coverage: Insights from  
746 community-based cardiovascular disease research in urban poor communities in Accra,  
747 Ghana. *BMC Public Health*. 2014;14: 1–9. doi:10.1186/1471-2458-14-S2-S3/TABLES/2
- 748 49. Iwelunmor J, Gyamfi J, Plange-Rhule J, Blackstone S, Quakyi NK, Ntim M, et al.  
749 Exploring stakeholders’ perceptions of a task-shifting strategy for hypertension control in  
750 Ghana: A qualitative study. *BMC Public Health*. 2017;17: 1–9. doi:10.1186/S12889-017-  
751 4127-9/PEER-REVIEW

- 752 50. Ogedegbe G, Gyamfi J, Plange-Rhule J, Surkis A, Rosenthal DM, Airhihenbuwa C, et al.  
753 Task shifting interventions for cardiovascular risk reduction in low-income and middle-  
754 income countries: a systematic review of randomised controlled trials. *BMJ Open*. 2014;4.  
755 doi:10.1136/BMJOPEN-2014-005983
- 756 51. Iwelunmor J, Gyamfi J, Plange-Rhule J, Blackstone S, Quakyi NK, Ntim M, et al.  
757 Exploring stakeholders' perceptions of a task-shifting strategy for hypertension control in  
758 Ghana: a qualitative study. *BMC Public Health*. 2017;17: 216. doi:10.1186/s12889-017-  
759 4127-9
- 760 52. Iwelunmor J, Onakomaiya D, Gyamfi J, Nyame S, Apusiga K, Adjei K, et al. Adopting  
761 Task-Shifting Strategies for Hypertension Control in Ghana: Insights From a Realist  
762 Synthesis of Stakeholder Perceptions. *Glob Heart*. 2019;14: 119.  
763 doi:10.1016/j.gheart.2019.05.007
- 764 53. Tenkorang EY. Health Provider Characteristics and Choice of Health Care Facility among  
765 Ghanaian Health Seekers. <https://doi.org/10.1080/2328860420161171282>. 2016;2: 160–  
766 170. doi:10.1080/23288604.2016.1171282
- 767 54. Ware LJ, Schutte AE. Team-based care for hypertensive patients is essential in low- and  
768 middle-income countries. *The Journal of Clinical Hypertension*. 2019;21: 1210–1211.  
769 doi:10.1111/JCH.13586

770

771

772 [Supporting information](#)

773 S1 Table. STROBE Checklist

## Self-reported familiarity with hypertension treatment guidelines among healthcare providers in Kumasi, Ghana (n=64)

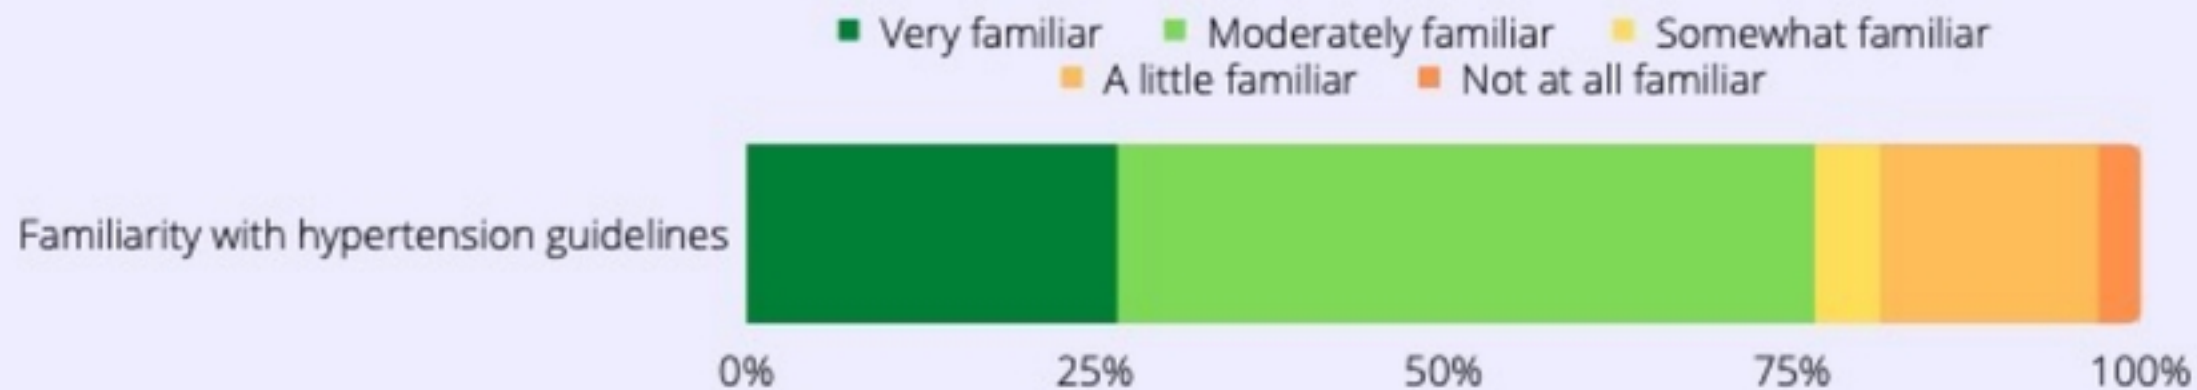

Self-reported familiarity with hypertension treatment guidelines



## Self-reported confidence in adhering to hypertension treatment guidelines among nurses and other clinical staff in Kumasi, Ghana (n=57\*)

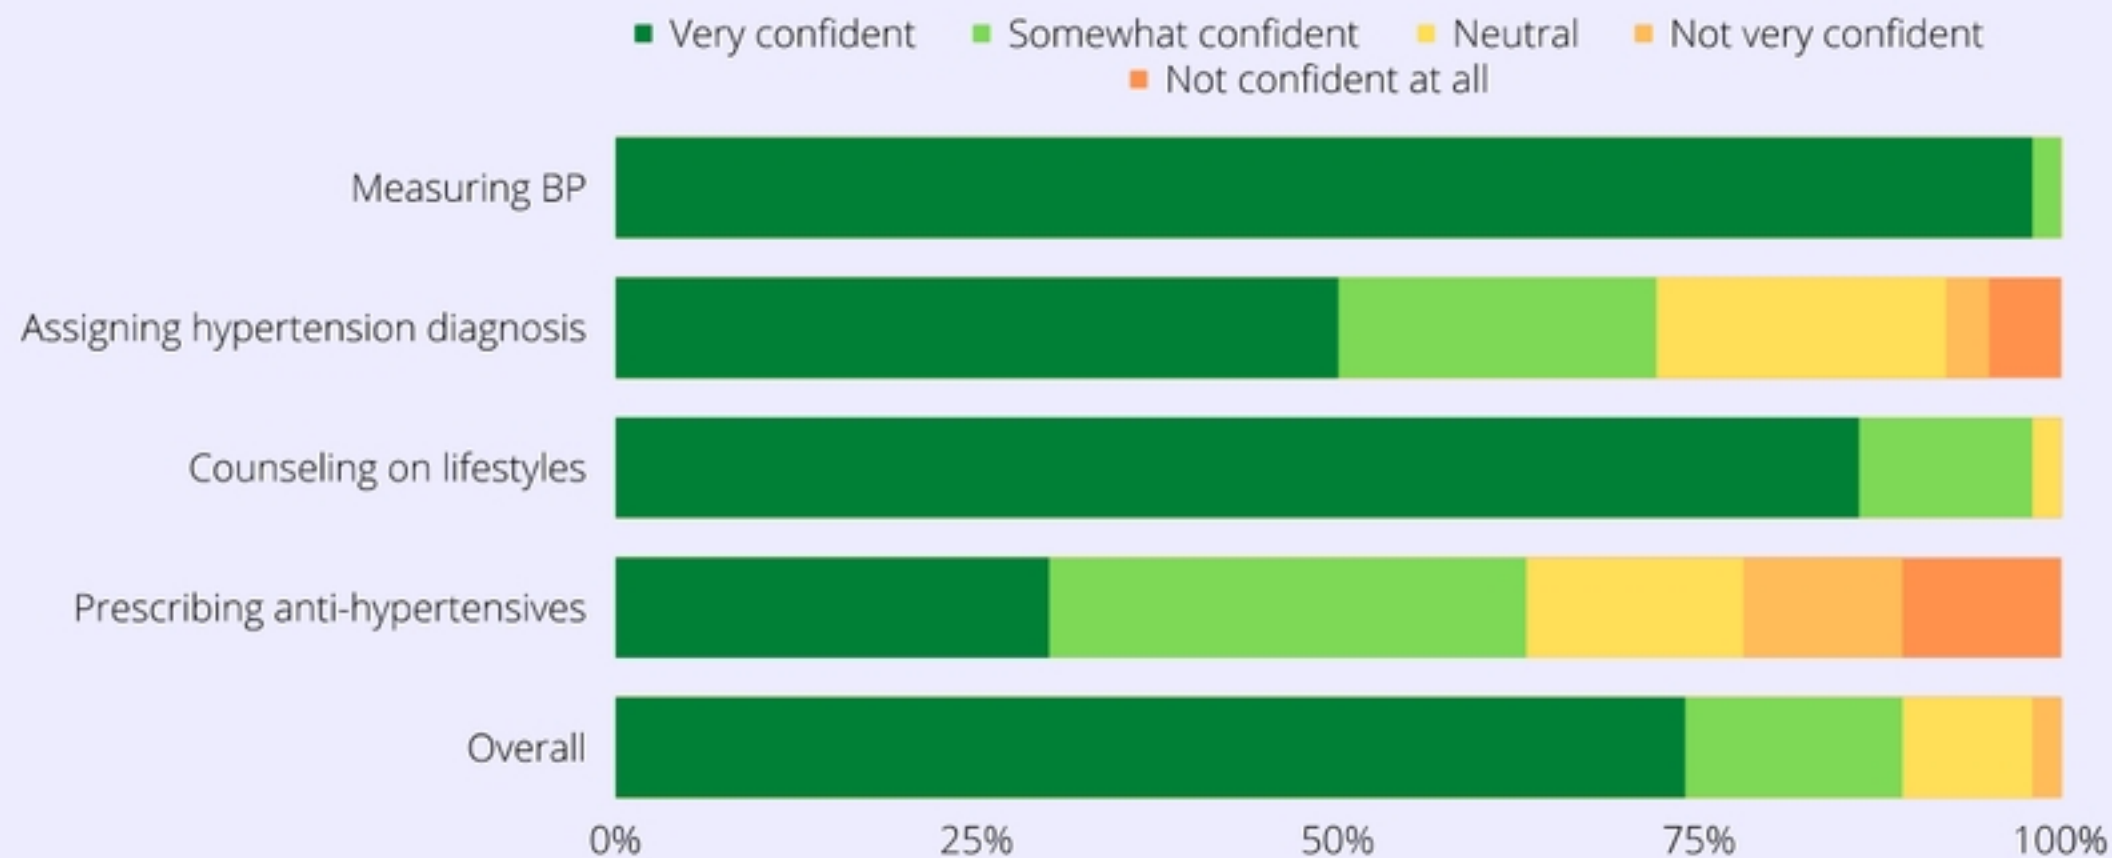

\*Number of respondents varies by those who reported ever involved in performing the specific activity (Measuring BP: 55; Assigning diagnosis: 40; Counselling on lifestyles: 44; Prescribing antihypertensive med.: 27; Overall management of hypertension: 53)

Self-reported confidence in adhering to hypertension treatment
